# Supplementary material for: Do pelagic grazers benefit from sea ice? Insights from the Antarctic sea ice proxy IPSO 25
Source: Copernicus journal article supplement (doi:10.5194/bg-15-1987-2018), 2018-04-04
Supplement: Supplementary file 2 [file bg-15-1987-2018-supplement.zip]

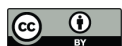

## *Supplement of*

# **Do pelagic grazers benefit from sea ice? Insights from the Antarctic sea ice proxy IPSO<sub>25</sub>**

**Katrin Schmidt et al.**

*Correspondence to:* Thomas A. Brown ([thomas.brown@sams.ac.uk](mailto:thomas.brown@sams.ac.uk)) and Simon T. Belt ([s.belt@plymouth.ac.uk](mailto:s.belt@plymouth.ac.uk))

- [bg-15-1987-2018-supplement-title-page.pdf](#)
- [data.doc](#)
- [figures.pdf](#)

The copyright of individual parts of the supplement might differ from the CC BY 4.0 License.
