# Supplementary material for: Do pelagic grazers benefit from sea ice? Insights from the Antarctic sea ice proxy IPSO 25
Source: Copernicus journal article supplement (doi:10.5194/bg-15-1987-2018), 2018-04-04
Supplement: Supplementary file 3 [file bg-15-1987-2018-supplement.zip]

Archive with 3 entries (3 files):
- figures.pdf
- bg-15-1987-2018-supplement-title-page.pdf
- data.doc
